# Supplementary material for: Qualitative Differences Between the IFNα subtypes and IFNβ Influence Chronic Mucosal HIV-1 Pathogenesis
Source: PubMed Central journal article supplement (PMC7592919; doi:10.1371/journal.ppat.1008986), 2020-10-16
Supplement: ppat.1008986.s012.pdf [file ppat.1008986.s012.pdf]

**Table S5.** IFN $\alpha$  subtype-specific IRGs are unlikely to be regulated by other IFN $\alpha$  subtypes.

|                                 | Unique genes for each IFN $\alpha$ subtype |                         |                        |                         |                         |
|---------------------------------|--------------------------------------------|-------------------------|------------------------|-------------------------|-------------------------|
|                                 | IFN $\alpha$ 1 (N=110)                     | IFN $\alpha$ 2 (N=36)   | IFN $\alpha$ 5 (N=201) | IFN $\alpha$ 8 (N=48)   | IFN $\alpha$ 14 (N=257) |
| <b>Total genes</b>              |                                            |                         |                        |                         |                         |
| <b>IFN<math>\alpha</math>1</b>  |                                            |                         |                        |                         |                         |
| P-value                         |                                            | 0.269 [0.000690, 1.00]  | 0.208 [1.08e-06, 1.00] | 0.145 [0.000847, 0.905] | 0.266 [9.28e-05, 1.00]  |
| FDR                             |                                            | 0.934 [0.0398, 1.00]    | 0.884 [0.000119, 1.00] | 0.830 [0.0465, 1.00]    | 0.930 [0.00716, 1.00]   |
| <b>IFN<math>\alpha</math>2</b>  |                                            |                         |                        |                         |                         |
| P-value                         | 0.199 [4.25e-06, 1.00]                     |                         | 0.137 [3.09e-05, 1.00] | 0.191 [0.00391, 0.867]  | 0.116 [0.000231, 0.983] |
| FDR                             | 0.951 [0.000467, 1.00]                     |                         | 0.906 [0.00280, 1.00]  | 0.947 [0.158, 1.00]     | 0.873 [0.0156, 1.00]    |
| <b>IFN<math>\alpha</math>5</b>  |                                            |                         |                        |                         |                         |
| P-value                         | 0.150 [5.37e-07, 1.00]                     | 0.274 [0.000482, 1.00]  |                        | 0.271 [0.00120, 1.00]   | 0.526 [0.000603, 1.00]  |
| FDR                             | 0.747 [5.57e-05, 1.00]                     | 0.871 [0.0240, 1.00]    |                        | 0.868 [0.0474, 1.00]    | 0.967 [0.0281, 1.00]    |
| <b>IFN<math>\alpha</math>8</b>  |                                            |                         |                        |                         |                         |
| P-value                         | 0.173 [4.14e-07, 1.00]                     | 0.232 [0.000550, 0.935] | 0.266 [0.000662, 1.00] |                         | 0.300 [0.00317, 1.00]   |
| FDR                             | 1.00 [6.61e-05, 1.00]                      | 1.00 [0.0471, 1.00]     | 1.00 [0.0540, 1.00]    |                         | 1.00 [0.200, 1.00]      |
| <b>IFN<math>\alpha</math>14</b> |                                            |                         |                        |                         |                         |
| P-value                         | 0.239 [4.01e-05, 0.979]                    | 0.299 [0.00254, 0.971]  | 0.397 [0.000398, 1.00] | 0.283 [0.0234, 0.891]   |                         |
| FDR                             | 1.00 [0.00489, 1.00]                       | 1.00 [0.171, 1.00]      | 1.00 [0.0370, 1.00]    | 1.00 [0.613, 1.00]      |                         |

\*Rows are the median and [min,max] p-value or FDR for the genes in that column, but in the other IFN $\alpha$  subtypes
