# Supplementary material for: Qualitative Differences Between the IFNα subtypes and IFNβ Influence Chronic Mucosal HIV-1 Pathogenesis
Source: PLoS Pathog. 2020 Oct 16;16(10):e1008986. doi: 10.1371/journal.ppat.1008986 (PMC7592919; doi:10.1371/journal.ppat.1008986)
Supplement: S3 Table — (XLSX) [file ppat.1008986.s010.xlsx]

## Sheet: all
Table S3. Core IRGs at different Fold-Change Cut-off Criteria
Up-regulated IRGs							Fold-change
Gene_ID	Symbol	FC 1.5	FC 2.0	FC 2.5	FC 3.0	Description	IFNa1	IFNa2	IFNa5	IFNa8	IFNa14	IFNβ
ENSG00000225964.5	NRIR	√	√	√	√	negative regulator of interferon response	93.6853	83.0006	70.3389	97.1069	99.5765	114.034
ENSG00000119917.13	IFIT3	√	√	√	√	interferon induced protein with tetratricopeptide repeats 3	109.993	82.9874	101.913	65.7388	56.4256	101.293
ENSG00000135114.12	OASL	√	√	√	√	2'-5'-oligoadenylate synthetase like	65.2963	56.4335	89.8397	50.963	38.0066	64.896
ENSG00000134321.11	RSAD2	√	√	√	√	radical S-adenosyl methionine domain containing 2	61.5976	58.8862	71.834	49.3211	45.4773	61.8899
ENSG00000078081.7	LAMP3	√	√	√	√	lysosomal associated membrane protein 3	71.7329	66.5257	48.5781	42.2304	48.0047	45.3631
ENSG00000137959.15	IFI44L	√	√	√	√	interferon induced protein 44 like	54.3743	56.8696	60.2032	54.78	50.4945	55.2643
ENSG00000185745.9	IFIT1	√	√	√	√	interferon induced protein with tetratricopeptide repeats 1	57.9708	55.7364	62.4291	48.4436	46.4013	58.4631
ENSG00000205837.7	LINC00487	√	√	√	√	long intergenic non-protein coding RNA 487	44.3883	47.8004	41.1188	53.7946	50.7063	19.0138
ENSG00000089127.12	OAS1	√	√	√	√	2'-5'-oligoadenylate synthetase 1	52.6837	48.2717	52.1327	38.851	40.6894	42.2114
ENSG00000132530.16	XAF1	√	√	√	√	XIAP associated factor 1	38.0697	39.8031	49.1431	37.8631	31.4299	36.5737
ENSG00000119922.9	IFIT2	√	√	√	√	interferon induced protein with tetratricopeptide repeats 2	49.1625	43.4651	52.8106	26.6223	24.2072	52.0256
ENSG00000111331.12	OAS3	√	√	√	√	2'-5'-oligoadenylate synthetase 3	38.3263	41.406	44.7045	29.5838	29.693	39.5171
ENSG00000187608.8	ISG15	√	√	√	√	ISG15 ubiquitin-like modifier	49.0017	32.8655	44.2068	23.7804	22.0171	27.1577
ENSG00000126709.14	IFI6	√	√	√	√	interferon alpha inducible protein 6	29.7996	36.1889	52.8887	25.9568	22.4873	30.3707
ENSG00000225886.3	RP11-288L9.4	√	√	√	√	novel transcript, antisense to IFI6	35.8996	30.939	45.3165	29.4987	21.1393	22.8116
ENSG00000157601.13	MX1	√	√	√	√	MX dynamin like GTPase 1	36.7937	30.1984	38.3849	26.5446	23.3112	29.9765
ENSG00000134326.11	CMPK2	√	√	√	√	cytidine/uridine monophosphate kinase 2	28.985	33.9362	29.7089	30.2588	27.6505	33.1033
ENSG00000168961.16	LGALS9	√	√	√	√	galectin 9	27.1486	30.0684	41.6806	24.1177	16.6843	24.9173
ENSG00000184979.9	USP18	√	√	√	√	ubiquitin specific peptidase 18	25.7585	26.7082	51.0772	20.9107	15.236	22.2928
ENSG00000165949.12	IFI27	√	√	√	√	interferon alpha inducible protein 27	31.3989	22.7418	25.3489	23.6019	22.0189	19.2355
ENSG00000201649.1	RNY4P34	√	√	√	√	RNY4 pseudogene 34	26.2808	17.5248	40.2201	21.1254	15.7781	18.6909
ENSG00000168026.17	TTC21A	√	√	√	√	tetratricopeptide repeat domain 21A	25.4134	20.7297	36.2677	18.8643	13.9903	24.1115
ENSG00000004468.12	CD38	√	√	√	√	CD38 molecule	27.0648	21.7197	35.8908	12.2421	9.73909	17.0838
ENSG00000138646.8	HERC5	√	√	√	√	HECT and RLD domain containing E3 ubiquitin protein ligase 5	26.5831	20.5319	19.3682	17.8237	18.5022	17.6221
ENSG00000188313.12	PLSCR1	√	√	√	√	phospholipid scramblase 1	21.6001	20.9543	18.1081	18.9762	17.9382	21.2016
ENSG00000137965.10	IFI44	√	√	√	√	interferon induced protein 44	17.9887	20.0241	21.5068	17.683	17.752	20.3939
ENSG00000136514.2	RTP4	√	√	√	√	receptor transporter protein 4	25.7786	19.1924	15.8479	14.2187	16.2214	18.4744
ENSG00000130589.16	HELZ2	√	√	√	√	helicase with zinc finger 2	26.6704	15.9875	18.1159	14.5822	12.3054	14.1257
ENSG00000177409.11	SAMD9L	√	√	√	√	sterile alpha motif domain containing 9 like	17.1038	17.262	19.9054	14.2592	12.3997	18.9964
ENSG00000188157.13	AGRN	√	√	√	√	agrin	15.7122	12.1168	20.6549	18.6871	13.6274	15.6795
ENSG00000196141.13	SPATS2L	√	√	√	√	spermatogenesis associated serine rich 2 like	22.9886	14.3023	15.7517	12.4728	10.4196	14.8216
ENSG00000138496.16	PARP9	√	√	√	√	poly(ADP-ribose) polymerase family member 9	15.8435	16.3667	11.0384	12.3635	16.7719	21.9404
ENSG00000251301.6	RP11-81H14.2	√	√	√	√	long intergenic non-protein coding RNA 2384	23.452	13.0085	21.0699	6.54601	5.42215	3.87835
ENSG00000185507.19	IRF7	√	√	√	√	interferon regulatory factor 7	17.8548	11.5223	11.9129	13.3827	12.7575	10.9988
ENSG00000110492.15	MDK	√	√	√	√	midkine	11.4344	13.4929	24.1731	9.0745	8.52348	12.2408
ENSG00000142089.15	IFITM3	√	√	√	√	interferon induced transmembrane protein 3	18.1806	13.0329	15.9886	10.2536	7.94906	10.1225
ENSG00000246375.2	RP11-10L7.1	√	√	√	√	PPM1K divergent transcript	14.749	14.0769	18.7075	9.42549	8.43257	8.0037
ENSG00000111335.12	OAS2	√	√	√	√	2'-5'-oligoadenylate synthetase 2	12.087	12.4693	14.0074	10.9718	10.0064	9.41888
ENSG00000115415.18	STAT1	√	√	√	√	signal transducer and activator of transcription 1	13.0891	12.2129	12.8808	10.502	9.44587	11.3407
ENSG00000183486.12	MX2	√	√	√	√	MX dynamin like GTPase 2	12.6896	10.7862	13.6388	10.7945	9.83218	12.2352
ENSG00000133106.14	EPSTI1	√	√	√	√	epithelial stromal interaction 1	12.5697	11.4856	9.94178	10.3764	12.7616	15.6968
ENSG00000125148.6	MT2A	√	√	√	√	metallothionein 2A	17.4993	11.337	12.5589	8.99934	6.54746	12.0058
ENSG00000152689.17	RASGRP3	√	√	√	√	RAS guanyl releasing protein 3	14.5613	11.8066	13.339	7.84262	8.21448	16.0942
ENSG00000162614.18	NEXN	√	√	√	√	nexilin F-actin binding protein	13.9853	10.3622	16.8734	8.03959	6.26401	10.9784
ENSG00000068079.7	IFI35	√	√	√	√	interferon induced protein 35	11.8844	10.3863	14.3425	8.45181	8.58373	8.1825
ENSG00000055332.16	EIF2AK2	√	√	√	√	eukaryotic translation initiation factor 2 alpha kinase 2	9.98368	10.7868	11.8528	10.4033	10.5757	10.709
ENSG00000138035.14	PNPT1	√	√	√	√	polyribonucleotide nucleotidyltransferase 1	10.989	11.1575	14.8574	8.87168	7.50267	10.8088
ENSG00000177989.13	ODF3B	√	√	√	√	outer dense fiber of sperm tails 3B	9.62784	8.46439	17.425	9.35672	8.06235	12.2643
ENSG00000196684.12	HSH2D	√	√	√	√	hematopoietic SH2 domain containing	10.4574	11.1033	11.4756	10.3802	8.79846	10.9322
ENSG00000197121.14	PGAP1	√	√	√	√	post-GPI attachment to proteins 1	12.1829	10.2608	12.2242	7.17841	7.21682	7.31707
ENSG00000010030.13	ETV7	√	√	√	√	ETS variant 7	11.6915	10.5898	9.58871	9.43068	7.62062	13.1796
ENSG00000181381.13	DDX60L	√	√	√	√	DExD/H-box 60 like	10.4079	10.0736	10.4877	9.21476	7.98218	10.0729
ENSG00000025708.13	TYMP	√	√	√	√	thymidine phosphorylase	8.95851	9.24978	15.8687	7.82354	6.10127	8.41075
ENSG00000124256.14	ZBP1	√	√	√	√	Z-DNA binding protein 1	13.7479	8.59084	9.67597	7.87906	7.02874	9.30504
ENSG00000137628.16	DDX60	√	√	√	√	DExD/H-box helicase 60	9.35601	9.39321	9.61259	8.96714	9.23213	11.5376
ENSG00000225492.6	GBP1P1	√	√	√	√	Guanylate Binding Protein 1 Pseudogene 1	8.63343	9.36447	17.2783	6.94183	3.90998	7.23912
ENSG00000117228.9	GBP1	√	√	√	√	guanylate binding protein 1	10.5303	9.42969	11.5733	7.21795	6.22625	8.58362
ENSG00000115267.5	IFIH1	√	√	√	√	interferon induced with helicase C domain 1	9.03084	9.77988	9.45752	8.10526	7.72612	10.0882
ENSG00000092295.11	TGM1	√	√	√	√	transglutaminase 1	10.5898	8.68241	9.79362	7.65379	4.78213	7.99346
ENSG00000247317.3	RP11-273G15.2	√	√	√	√	LY6E divergent transcript	8.05309	9.63936	8.31653	7.21063	7.50935	8.22769
ENSG00000279320.1	AC069528.2	√	√	√	√	long non-protein coding RNA	8.51817	8.23845	5.80974	9.55625	8.59208	7.1105
ENSG00000138642.14	HERC6	√	√	√	√	HECT and RLD domain containing E3 ubiquitin protein ligase family member 6	7.76992	7.93161	11.3442	7.37675	6.22149	7.118
ENSG00000172183.14	ISG20	√	√	√	√	interferon stimulated exonuclease gene 20	10.8987	8.13345	8.19665	6.95965	6.44229	7.9212
ENSG00000238015.2	RPL23P3	√	√	√	√	Ribosomal Protein L23 Pseudogene 3	6.39876	8.15496	10.5347	8.68848	6.14034	5.19764
ENSG00000152778.8	IFIT5	√	√	√	√	interferon induced protein with tetratricopeptide repeats 5	8.47476	7.29429	7.29375	7.64165	8.78697	10.8498
ENSG00000089692.8	LAG3	√	√	√	√	lymphocyte activating 3	8.89183	7.38793	11.5395	6.23864	4.99854	5.59709
ENSG00000002549.12	LAP3	√	√	√	√	leucine aminopeptidase 3	6.44171	7.97194	11.8209	6.44079	5.93338	6.69828
ENSG00000164342.12	TLR3	√	√	√	√	toll like receptor 3	11.2073	7.49267	7.40971	7.12081	5.37411	8.80163
ENSG00000107201.9	DDX58	√	√	√	√	DExD/H-box helicase 58	8.43295	7.85568	8.73866	6.99872	6.17949	8.29841
ENSG00000107798.17	LIPA	√	√	√	√	lipase A, lysosomal acid type	7.4942	7.38865	8.97232	6.74009	5.74924	6.62853
ENSG00000160932.10	LY6E	√	√	√	√	lymphocyte antigen 6 family member E	9.02458	6.48798	7.68173	6.60947	6.42331	6.93914
ENSG00000178685.13	PARP10	√	√	√	√	poly(ADP-ribose) polymerase family member 10	7.93234	6.00412	11.028	6.23116	4.84633	7.63633
ENSG00000283138.1	RP3-488M23.3	√	√	√	√	novel transcript, antisense to EFCAB4B	8.8016	7.81562	10.1768	4.94216	3.67171	1.41164
ENSG00000156587.15	UBE2L6	√	√	√	√	ubiquitin conjugating enzyme E2 L6	10.3808	6.51834	6.28862	6.07846	5.81324	6.5705
ENSG00000121060.15	TRIM25	√	√	√	√	tripartite motif containing 25	9.72483	6.46832	6.00961	6.39614	5.80751	7.32775
ENSG00000261267.1	RP11-44I10.3	√	√	√	√	novel transcript, antisense to N4BP1	9.52325	6.64943	4.7116	5.36164	7.26821	7.81017
ENSG00000280007.1	AC008079.10	√	√	√	√	novel transcript, antisense to TUBA8	5.97796	6.44316	8.63874	6.34193	5.78286	5.51285
ENSG00000121858.10	TNFSF10	√	√	√	√	TNF superfamily member 10	6.9967	6.36924	11.0214	4.69909	3.25596	5.96101
ENSG00000279236.1	AC064801.2	√	√	√	√	novel transcript	8.51646	7.36685	5.9519	4.75462	5.35334	4.63596
ENSG00000205413.7	SAMD9	√	√	√	√	sterile alpha motif domain containing 9	6.46464	6.74899	7.15324	5.80677	5.23629	7.36
ENSG00000173193.13	PARP14	√	√	√	√	poly(ADP-ribose) polymerase family member 14	6.20388	6.38386	7.51894	5.73682	4.96307	5.79951
ENSG00000059378.12	PARP12	√	√	√	√	poly(ADP-ribose) polymerase family member 12	7.45172	5.842	6.4212	5.67637	5.08817	7.05256
ENSG00000122643.18	NT5C3A	√	√	√	√	5'-nucleotidase, cytosolic IIIA	7.25534	6.65371	6.65777	5.28776	4.51446	6.07314
ENSG00000132274.15	TRIM22	√	√	√	√	tripartite motif containing 22	5.7963	6.32146	6.07951	5.56692	6.49338	7.66462
ENSG00000170581.13	STAT2	√	√	√	√	signal transducer and activator of transcription 2	8.18536	5.03328	7.33069	5.02271	4.19873	5.62532
ENSG00000120549.17	KIAA1217	√	√	√	√	KIAA1217	6.32074	5.57206	7.1913	5.84026	4.04786	5.22941
ENSG00000116663.10	FBXO6	√	√	√	√	F-box protein 6	7.04257	6.02829	5.55211	6.34991	3.27507	4.39204
ENSG00000196116.7	TDRD7	√	√	√	√	tudor domain containing 7	6.1047	6.29638	3.98829	4.82511	6.98308	10.1145
ENSG00000108771.12	DHX58	√	√	√	√	DExH-box helicase 58	6.62711	5.05553	5.47905	5.24453	5.72418	6.57381
ENSG00000117298.14	ECE1	√	√	√	√	endothelin converting enzyme 1	6.4439	5.43984	7.77285	4.17321	3.76381	4.4598
ENSG00000272669.1	RP3-508I15.21	√	√	√	√	novel transcript, antisense to SUN2	8.51595	5.24784	7.14679	3.21698	3.08703	5.01689
ENSG00000154451.14	GBP5	√	√	√	√	guanylate binding protein 5	5.63029	5.19787	7.91111	4.59389	3.58154	5.43771
ENSG00000282851.1	BISPR	√	√	√	√	BST2 interferon stimulated positive regulator	5.57431	4.80901	6.44238	5.04005	4.88321	4.37703
ENSG00000163840.9	DTX3L	√	√	√	√	deltex E3 ubiquitin ligase 3L	4.86204	5.61082	6.45042	4.90918	4.4915	4.68103
ENSG00000108679.12	LGALS3BP	√	√	√	√	galectin 3 binding protein	6.67148	4.89958	6.47371	4.37307	3.89705	4.18131
ENSG00000112773.15	FAM46A	√	√	√	√	terminal nucleotidyltransferase 5A	5.89923	4.64797	6.59711	4.37267	4.0284	6.98447
ENSG00000167207.11	NOD2	√	√	√	√	nucleotide binding oligomerization domain containing 2	6.24488	5.37594	5.15784	4.18587	3.669	3.63043
ENSG00000243560.3	RN7SL364P	√	√	√	√	RNA, 7SL, cytoplasmic 364, pseudogene	4.60464	5.31766	5.00924	5.61359	3.78565	6.26433
ENSG00000135899.16	SP110	√	√	√	√	SP110 nuclear body protein	4.9183	4.35371	5.13613	4.58814	3.83439	3.56014
ENSG00000130303.12	BST2	√	√	√	√	bone marrow stromal cell antigen 2	5.62405	5.32849	4.12254	4.06764	3.58307	4.87684
ENSG00000213928.8	IRF9	√	√	√	√	interferon regulatory factor 9	4.14142	4.06459	6.72483	4.08028	3.59424	4.55124
ENSG00000130813.17	C19orf66	√	√	√	√	chromosome 19 open reading frame 66	4.86385	4.42606	6.04053	3.69338	3.58001	3.74318
ENSG00000262979.1	CTD-2047H16.2	√	√	√	√	novel transcript	5.28176	5.10305	4.13695	4.42647	3.65025	3.67846
ENSG00000155363.18	MOV10	√	√	√	√	Mov10 RISC complex RNA helicase	5.42817	4.23673	5.11424	4.22135	3.5708	4.94634
ENSG00000267369.1	TAF5LP1	√	√	√	√	TATA-Box Binding Protein Associated Factor 5 Like Pseudogene 1	5.7846	5.31569	4.49324	3.48751	3.28474	3.44809
ENSG00000130066.16	SAT1	√	√	√	√	spermidine/spermine N1-acetyltransferase 1	5.0468	4.5352	5.46725	3.84121	3.33522	4.03738
ENSG00000162437.14	RAVER2	√	√	√	√	ribonucleoprotein, PTB binding 2	5.00043	3.79231	4.82359	5.21839	3.26432	1.98152
ENSG00000173821.19	RNF213	√	√	√	√	ring finger protein 213	5.11113	4.31914	5.39762	3.89807	3.3406	3.97151
ENSG00000105287.12	PRKD2	√	√	√	√	protein kinase D2	4.64652	4.59568	5.48311	3.84858	3.33946	3.29071
ENSG00000132109.9	TRIM21	√	√	√	√	tripartite motif containing 21	4.89145	4.7313	4.39485	3.87863	4.0147	5.35627
ENSG00000146859.6	TMEM140	√	√	√	√	transmembrane protein 140	5.6239	4.30443	4.31205	4.0288	3.56725	5.92636
ENSG00000168016.13	TRANK1	√	√	√	√	tetratricopeptide repeat and ankyrin repeat containing 1	4.65795	4.76171	4.88655	3.81618	3.69115	5.07645
ENSG00000162433.14	AK4	√	√	√	√	adenylate kinase 4	4.56172	4.54287	4.72353	4.08974	3.69086	4.07241
ENSG00000152749.7	GPR180	√	√	√	√	G protein-coupled receptor 180	4.27376	4.49997	5.58178	3.80173	3.20108	4.63168
ENSG00000169679.14	BUB1	√	√	√	√	BUB1 mitotic checkpoint serine/threonine kinase	5.27673	4.35281	4.23536	3.83029	3.377	5.1155
ENSG00000259529.1	RP11-468E2.4	√	√	√	√	novel transcript	4.1487	3.76219	6.28128	3.50716	3.20472	3.8294
ENSG00000163644.14	PPM1K	√	√	√	√	protein phosphatase, Mg2+/Mn2+ dependent 1K	4.90628	4.57195	3.92676	3.55713	3.84921	4.09095
ENSG00000136147.17	PHF11	√	√	√	√	PHD finger protein 11	4.3757	4.35671	4.53432	3.939	3.52022	3.72227
ENSG00000110057.7	UNC93B1	√	√	√	√	unc-93 homolog B1, TLR signaling regulator	5.2699	3.93376	5.04377	3.1479	3.06512	4.12393
ENSG00000120539.14	MASTL	√	√	√	√	microtubule associated serine/threonine kinase like	3.85984	3.81691	5.17758	3.83577	3.67994	4.26201
ENSG00000137200.12	CMTR1	√	√	√	√	cap methyltransferase 1	4.21826	4.05739	4.94266	3.72016	3.41765	3.36156
ENSG00000141664.9	ZCCHC2	√	√	√	√	zinc finger CCHC-type containing 2	3.92827	4.06998	4.28815	3.7948	3.44874	3.79282
ENSG00000102921.7	N4BP1	√	√	√	√	NEDD4 binding protein 1	4.33065	3.52733	4.5157	3.56044	3.4503	3.53445
ENSG00000160710.15	ADAR	√	√	√	√	adenosine deaminase, RNA specific	3.63728	3.62071	4.74033	3.58455	3.68605	3.93173
ENSG00000061938.16	TNK2	√	√	√	√	tyrosine kinase non receptor 2	5.2173	3.45254	3.91046	3.21563	3.21002	3.33725
ENSG00000175550.7	DRAP1	√	√	√	√	DR1 associated protein 1	3.55848	3.74116	4.52938	3.68461	3.32786	4.35666
ENSG00000123609.10	NMI	√	√	√	√	N-myc and STAT interactor	3.75585	4.27254	4.41684	3.06152	3.15278	3.79025
ENSG00000132256.18	TRIM5	√	√	√	√	tripartite motif containing 5	3.98153	4.0071	4.2275	3.2926	3.14737	3.63605
ENSG00000267074.1	RP11-1094M14.5	√	√	√	√	novel transcript, sense intronic SLFN12L	3.30784	3.78865	4.35236	3.52244	3.28821	4.54695
ENSG00000163565.18	IFI16	√	√	√	√	interferon gamma inducible protein 16	3.43415	3.76193	3.90669	3.33785	3.50475	4.12999
ENSG00000067066.16	SP100	√	√	√	√	SP100 nuclear antigen	3.72662	3.56942	4.04683	3.41295	3.09691	3.63618
ENSG00000225963.7	AC009950.2	√	√	√		novel transcript, antisense to SP110	3.63927	4.36483	8.77242	4.48465	2.72149	4.00639
ENSG00000172936.12	MYD88	√	√	√		MYD88, innate immune signal transduction adaptor	5.40736	4.66203	2.96725	3.5798	5.19282	6.70137
ENSG00000122729.18	ACO1	√	√	√		aconitase 1	4.45968	4.1511	6.13017	4.1205	2.74458	3.62697
ENSG00000185201.16	IFITM2	√	√	√		interferon induced transmembrane protein 2	4.28922	3.88384	6.03696	3.06598	2.64045	2.97614
ENSG00000161692.17	DBF4B	√	√	√		DBF4 zinc finger B	5.18136	3.28903	4.88618	2.96574	2.63486	3.3179
ENSG00000229054.1	RPS29P14	√	√	√		Ribosomal Protein S29 Pseudogene 14	4.05012	4.27331	3.11621	4.23539	2.99942	5.12929
ENSG00000102524.11	TNFSF13B	√	√	√		TNF superfamily member 13b	4.20545	3.57648	4.42048	2.98644	2.67649	3.0757
ENSG00000135148.11	TRAFD1	√	√	√		TRAF-type zinc finger domain containing 1	4.45482	3.68462	3.92345	2.98903	2.721	3.2939
ENSG00000146409.10	SLC18B1	√	√	√		solute carrier family 18 member B1	4.22574	3.47896	3.85834	3.34721	2.61215	3.21108
ENSG00000281100.1	AC105749.1	√	√	√		novel transcript	4.5496	3.44368	3.03459	3.46932	2.79745	2.80994
ENSG00000197536.10	C5orf56	√	√	√		chromosome 5 open reading frame 56	3.82102	3.62415	3.85281	3.33131	2.64389	3.36877
ENSG00000154760.13	SLFN13	√	√	√		schlafen family member 13	2.80276	3.54336	4.45015	3.33083	3.12773	3.40995
ENSG00000115607.9	IL18RAP	√	√	√		interleukin 18 receptor accessory protein	4.16533	3.17789	3.15684	2.9392	3.75498	3.72094
ENSG00000138760.8	SCARB2	√	√	√		scavenger receptor class B member 2	4.26183	3.64518	3.20704	3.29913	2.75037	3.62237
ENSG00000221963.5	APOL6	√	√	√		apolipoprotein L6	3.9713	3.52113	4.04022	3.0308	2.56376	3.31083
ENSG00000169047.5	IRS1	√	√	√		insulin receptor substrate 1	3.98646	3.71474	3.74205	2.69193	2.70513	3.06506
ENSG00000090104.11	RGS1	√	√	√		regulator of G protein signaling 1	3.68735	3.94827	3.16112	3.07374	2.92073	3.86804
ENSG00000135535.15	CD164	√	√	√		CD164 molecule	3.46896	3.65567	2.76357	2.8961	3.84741	3.85011
ENSG00000155158.20	TTC39B	√	√	√		tetratricopeptide repeat domain 39B	3.16528	3.42145	4.49205	2.53628	2.56142	2.84274
ENSG00000070190.12	DAPP1	√	√	√		dual adaptor of phosphotyrosine and 3-phosphoinositides 1	3.54791	3.3941	3.64617	2.74694	2.75282	3.8576
ENSG00000132965.9	ALOX5AP	√	√	√		arachidonate 5-lipoxygenase activating protein	3.01541	3.28549	3.22408	2.98249	3.27122	2.61984
ENSG00000110848.8	CD69	√	√	√		CD69 molecule	3.59107	3.31358	2.65065	2.65177	3.42052	3.46058
ENSG00000106785.14	TRIM14	√	√	√		tripartite motif containing 14	2.87965	3.0122	3.66981	2.89757	2.67469	2.6806
ENSG00000204147.9	ASAH2B	√	√	√		N-acylsphingosine amidohydrolase 2B	2.68085	3.65096	3.35481	2.73008	2.58326	4.23674
ENSG00000187741.14	FANCA	√	√			FA complementation group A	4.78822	3.76892	5.69603	3.28616	2.27972	3.58097
ENSG00000103966.10	EHD4	√	√			EH domain containing 4	6.17242	3.7682	4.43268	2.96491	2.23321	4.03959
ENSG00000163328.13	GPR155	√	√			G protein-coupled receptor 155	3.92372	3.92084	6.30836	2.98091	2.2277	3.08054
ENSG00000100342.20	APOL1	√	√			apolipoprotein L1	4.24564	3.75758	5.47407	2.77023	2.42021	2.92608
ENSG00000140464.19	PML	√	√			promyelocytic leukemia	3.31282	3.73231	5.99989	3.10198	2.33056	3.30326
ENSG00000086065.13	CHMP5	√	√			charged multivesicular body protein 5	4.13895	3.80462	2.30504	3.54298	4.33329	3.87754
ENSG00000017483.14	SLC38A5	√	√			solute carrier family 38 member 5	3.301	3.4877	5.89257	2.96709	2.02752	3.38895
ENSG00000120217.13	CD274	√	√			CD274 molecule	3.7825	3.97552	3.82627	3.31347	2.45124	3.0398
ENSG00000136213.9	CHST12	√	√			carbohydrate sulfotransferase 12	3.29736	3.54148	5.02702	2.94952	2.38309	2.80471
ENSG00000101347.8	SAMHD1	√	√			SAM and HD domain containing deoxynucleoside triphosphate triphosphohydrolase 1	3.71983	3.35779	4.31399	2.9475	2.44841	2.68147
ENSG00000162654.8	GBP4	√	√			guanylate binding protein 4	3.61662	3.29441	3.92903	2.99185	2.45116	3.32828
ENSG00000274307.1	RP11-345J18.2	√	√			novel transcript, sense intronic to ATP10A	3.86023	2.97414	3.94847	2.7297	2.13868	2.25152
ENSG00000079263.18	SP140	√	√			SP140 nuclear body protein	3.4451	3.17537	4.15919	2.78097	2.06508	2.58516
ENSG00000204397.7	CARD16	√	√			caspase recruitment domain family member 16	4.24102	2.93926	3.58082	2.09329	2.38593	3.07304
ENSG00000139618.14	BRCA2	√	√			BRCA2, DNA repair associated	2.81063	3.23931	3.66171	2.63771	2.4295	3.11422
ENSG00000141682.11	PMAIP1	√	√			phorbol-12-myristate-13-acetate-induced protein 1	4.14464	2.84619	2.90385	2.48691	2.38257	3.89413
ENSG00000106392.10	C1GALT1	√	√			core 1 synthase, glycoprotein-N-acetylgalactosamine 3-beta-galactosyltransferase 1	3.12189	3.01083	3.52895	2.63383	2.46102	3.27139
ENSG00000111224.13	PARP11	√	√			poly(ADP-ribose) polymerase family member 11	2.77019	3.20242	3.5361	2.81162	2.41517	2.63949
ENSG00000163568.14	AIM2	√	√			absent in melanoma 2	2.72151	3.20163	3.63236	2.56403	2.4823	2.67831
ENSG00000141971.12	MVB12A	√	√			multivesicular body subunit 12A	2.43952	3.05544	4.07994	2.6547	2.33713	1.95441
ENSG00000141574.7	SECTM1	√	√			secreted and transmembrane 1	4.39966	2.49709	3.33423	2.15121	2.13014	2.8364
ENSG00000125826.19	RBCK1	√	√			RANBP2-type and C3HC4-type zinc finger containing 1	3.03781	2.8422	4.11644	2.35116	2.05544	2.28143
ENSG00000114127.10	XRN1	√	√			5'-3' exoribonuclease 1	3.11111	3.08043	3.47301	2.42625	2.05164	2.80445
ENSG00000163872.15	YEATS2	√	√			YEATS domain containing 2	3.7933	2.58308	2.74833	2.48405	2.49424	3.01985
ENSG00000187479.5	C11orf96	√	√			chromosome 11 open reading frame 96	4.14975	2.53359	2.59441	2.41859	2.28002	1.63208
ENSG00000146425.10	DYNLT1	√	√			dynein light chain Tctex-type 1	2.99514	2.95529	2.96726	2.42766	2.55125	2.92257
ENSG00000100918.12	REC8	√	√			REC8 meiotic recombination protein	3.40043	2.36611	2.26031	2.94768	2.79558	2.30586
ENSG00000112343.10	TRIM38	√	√			tripartite motif containing 38	2.6468	2.73776	3.39481	2.51733	2.07831	2.56412
ENSG00000101596.14	SMCHD1	√	√			structural maintenance of chromosomes flexible hinge domain containing 1	2.6956	2.61142	2.87989	2.54573	2.11823	2.60572
ENSG00000206190.11	ATP10A	√	√			ATPase phospholipid transporting 10A (putative)	3.28266	2.34592	2.7174	2.39758	2.0309	1.96115
ENSG00000166750.9	SLFN5	√	√			schlafen family member 5	2.01954	2.76388	2.94197	2.43951	2.55016	3.22112
ENSG00000130487.5	KLHDC7B	√	√			kelch domain containing 7B	2.73367	2.44764	2.61341	2.3455	2.39121	2.47616
ENSG00000143384.12	MCL1	√	√			MCL1, BCL2 family apoptosis regulator	2.92226	2.50702	2.08137	2.21202	2.65172	2.42708
ENSG00000115271.10	GCA	√	√			grancalcin	2.36391	2.66819	2.59973	2.28926	2.34166	3.18271
ENSG00000114541.14	FRMD4B	√	√			FERM domain containing 4B	2.7542	2.82226	2.43896	2.08269	2.07858	2.17886
ENSG00000151466.11	SCLT1	√	√			sodium channel and clathrin linker 1	2.72804	2.51257	2.55171	2.21455	2.10605	3.20856
ENSG00000137752.22	CASP1	√	√			caspase 1	2.49244	2.5788	2.28679	2.19669	2.4894	2.89922
ENSG00000136560.13	TANK	√	√			TRAF family member associated NFKB activator	2.53966	2.16264	2.23679	2.09364	2.00799	2.60757
ENSG00000124201.14	ZNFX1	√				zinc finger NFX1-type containing 1	3.69433	3.33363	4.64401	2.52191	1.92276	2.6871
ENSG00000198133.8	TMEM229B	√				transmembrane protein 229B	2.76712	2.69421	5.24732	2.10817	1.73865	1.77444
ENSG00000149218.4	ENDOD1	√				endonuclease domain containing 1	2.73228	2.67701	4.09803	1.99006	1.86661	2.80201
ENSG00000182179.11	UBA7	√				ubiquitin like modifier activating enzyme 7	3.49058	2.54588	3.48321	2.06288	1.75032	2.258
ENSG00000013374.15	NUB1	√				negative regulator of ubiquitin like proteins 1	2.89526	2.49596	3.43269	2.20545	1.87445	2.25905
ENSG00000155287.10	SLC25A28	√				solute carrier family 25 member 28	3.21411	2.57955	2.94488	2.27522	1.83638	2.98918
ENSG00000173786.16	CNP	√				2',3'-cyclic nucleotide 3' phosphodiesterase	3.05132	2.55254	3.15481	2.1619	1.90831	2.3811
ENSG00000122417.15	ODF2L	√				outer dense fiber of sperm tails 2 like	2.72913	2.54277	2.94883	2.18204	1.88057	2.76658
ENSG00000234127.8	TRIM26	√				tripartite motif containing 26	2.2008	2.3663	4.04671	2.02096	1.61661	1.74822
ENSG00000101608.12	MYL12A	√				myosin light chain 12A	2.06132	2.61433	2.42148	1.99704	3.09569	3.37277
ENSG00000185722.16	ANKFY1	√				ankyrin repeat and FYVE domain containing 1	2.00426	2.62374	3.53798	2.01021	1.804	1.79383
ENSG00000100911.14	PSME2	√				proteasome activator subunit 2	2.715	2.46452	2.71989	2.1459	1.72789	2.28401
ENSG00000127311.9	HELB	√				DNA helicase B	2.34183	2.36148	3.32238	2.02524	1.53528	2.01747
ENSG00000135655.14	USP15	√				ubiquitin specific peptidase 15	2.19033	2.54752	2.58729	2.27083	1.8681	2.32288
ENSG00000128335.13	APOL2	√				apolipoprotein L2	3.06828	2.14926	2.24219	2.08038	1.91977	2.70429
ENSG00000169871.12	TRIM56	√				tripartite motif containing 56	2.3813	2.19098	2.8361	2.01365	1.68052	1.92299
ENSG00000108424.9	KPNB1	√				karyopherin subunit beta 1	2.80633	2.16719	2.6072	1.89131	1.60313	1.95271
ENSG00000163512.13	AZI2	√				5-azacytidine induced 2	2.29679	2.29768	2.27521	1.9693	2.03424	2.90012
ENSG00000239713.7	APOBEC3G	√				apolipoprotein B mRNA editing enzyme catalytic subunit 3G	2.12575	2.07625	2.9614	1.7927	1.90245	1.97017
ENSG00000185880.12	TRIM69	√				tripartite motif containing 69	2.27501	2.21409	2.21771	2.14319	1.98248	2.03526
ENSG00000101577.9	LPIN2	√				lipin 2	3.11357	1.92989	2.41107	1.83016	1.53516	1.77811
ENSG00000163131.10	CTSS	√				cathepsin S	2.00226	2.39939	2.8274	1.77658	1.72313	2.11306
ENSG00000092010.14	PSME1	√				proteasome activator subunit 1	2.50592	2.1103	2.13293	1.98182	1.97245	2.065
ENSG00000153898.12	MCOLN2	√				mucolipin 2	1.89319	2.15084	3.18259	1.79918	1.65367	2.06849
ENSG00000172164.13	SNTB1	√				syntrophin beta 1	2.12935	2.19943	2.21236	1.91083	2.22077	3.1887
ENSG00000133943.20	C14orf159	√				D-glutamate cyclase	2.26591	2.25929	2.48261	1.79334	1.83799	2.1321
ENSG00000184898.6	RBM43	√				RNA binding motif protein 43	3.00325	2.03202	1.94159	1.86363	1.76798	2.44541
ENSG00000240065.7	PSMB9	√				proteasome subunit beta 9	2.28975	2.15933	2.60457	1.87609	1.65666	1.90295
ENSG00000171132.13	PRKCE	√				protein kinase C epsilon	2.10973	2.31079	2.44296	1.99894	1.71625	1.77769
ENSG00000086061.15	DNAJA1	√				DnaJ heat shock protein family (Hsp40) member A1	2.56716	2.20372	1.89433	1.94752	1.94645	2.42744
ENSG00000106560.10	GIMAP2	√				GTPase, IMAP family member 2	2.11531	2.18198	2.00959	1.78572	2.4609	2.7375
ENSG00000198286.9	CARD11	√				caspase recruitment domain family member 11	2.61971	2.02562	2.1025	1.83404	1.85716	1.81229
ENSG00000095380.10	NANS	√				N-acetylneuraminate synthase	2.14403	2.19638	2.1804	1.86083	1.97011	2.06216
ENSG00000140853.15	NLRC5	√				NLR family CARD domain containing 5	2.08715	2.08742	2.86198	1.75193	1.51076	1.89072
ENSG00000112576.12	CCND3	√				cyclin D3	2.37179	2.02578	2.50529	1.7686	1.58034	1.83427
ENSG00000172493.20	AFF1	√				AF4/FMR2 family member 1	1.81894	2.07636	1.95252	1.82578	2.43568	2.50442
ENSG00000197265.8	GTF2E2	√				general transcription factor IIE subunit 2	2.14004	1.83554	2.72864	1.70429	1.69641	1.5244
ENSG00000152818.18	UTRN	√				utrophin	1.99916	2.09772	2.4814	1.96268	1.55685	2.02059
ENSG00000196954.13	CASP4	√				caspase 4	2.03762	2.02503	2.43813	1.86906	1.71471	1.80226
ENSG00000159322.17	ADPGK	√				ADP dependent glucokinase	1.82836	2.12298	2.54584	1.76048	1.66191	2.20288
ENSG00000115604.10	IL18R1	√				interleukin 18 receptor 1	1.84417	2.22489	2.3286	1.53608	1.83531	1.99479
ENSG00000117226.11	GBP3	√				guanylate binding protein 3	2.19664	2.01607	2.01471	1.83464	1.67744	2.21237
ENSG00000136682.14	CBWD2	√				COBW domain containing 2	1.91806	1.81992	2.3127	1.97614	1.68392	2.20839
ENSG00000198087.7	CD2AP	√				CD2 associated protein	1.86266	2.09156	2.27276	1.73708	1.73795	2.1929
ENSG00000117475.13	BLZF1	√				basic leucine zipper nuclear factor 1	1.84308	1.86038	2.10292	1.98604	1.79038	2.09709
ENSG00000162909.17	CAPN2	√				calpain 2	1.84714	2.07607	2.14107	1.75559	1.69572	2.0852
ENSG00000034510.5	TMSB10	√				thymosin beta 10	2.07965	1.8776	1.962	1.81425	1.75998	2.10278
ENSG00000148175.12	STOM	√				stomatin	1.67956	1.89533	2.64435	1.50894	1.74215	1.92215
ENSG00000107290.13	SETX	√				senataxin	1.82853	1.91395	2.00406	1.74301	1.76081	2.0869
ENSG00000136169.16	SETDB2	√				SET domain bifurcated histone lysine methyltransferase 2	1.98317	1.79672	2.25019	1.66567	1.51486	1.69826
ENSG00000065882.15	TBC1D1	√				TBC1 domain family member 1	2.24684	1.7547	2.10961	1.62536	1.46879	1.74436
ENSG00000129515.18	SNX6	√				sorting nexin 6	2.00748	1.84106	2.14861	1.63233	1.56307	1.86115
ENSG00000102699.5	PARP4	√				poly(ADP-ribose) polymerase family member 4	1.81687	1.96902	2.02719	1.59394	1.63722	2.09319
ENSG00000074706.13	IPCEF1	√				interaction protein for cytohesin exchange factors 1	1.85529	1.93016	1.89204	1.66597	1.65923	1.83711
ENSG00000102081.13	FMR1	√				fragile X mental retardation 1	1.8269	1.83108	1.93481	1.75443	1.56314	1.78424
ENSG00000171115.3	GIMAP8	√				GTPase, IMAP family member 8	1.83771	1.67497	2.12147	1.67281	1.57814	1.73001
ENSG00000096968.13	JAK2	√				Janus kinase 2	1.73747	1.71221	2.16285	1.71341	1.53658	1.7432
ENSG00000136874.10	STX17	√				syntaxin 17	1.63597	1.87549	2.16449	1.60151	1.44506	1.54342
ENSG00000155313.15	USP25	√				ubiquitin specific peptidase 25	1.69352	1.672	1.8128	1.67234	1.54024	1.80233
Down-regulated IRGs							Fold-change
Gene_ID	Symbol	FC 1.5	FC 2.0	FC 2.5	FC 3.0	Description	IFNa1	IFNa2	IFNa5	IFNa8	IFNa14	IFNβ
ENSG00000256338.2	RPL41P2	√	√	√	√	Ribosomal Protein L41 Pseudogene 2	-11.976	-11.115	-7.82053	-10.4591	-11.9816	-11.48
ENSG00000196154.11	S100A4	√	√	√		S100 calcium binding protein A4	-5.25698	-3.25544	-3.2292	-3.26476	-2.87681	-3.12102
ENSG00000241084.1	RP11-344B5.3	√	√			novel transcript	-7.73756	-3.22506	-5.2319	-2.49974	-2.15433	-3.9339
ENSG00000186810.7	CXCR3	√	√			C-X-C motif chemokine receptor 3	-3.84654	-2.9147	-6.46034	-2.85541	-2.48672	-3.10628
ENSG00000172965.14	MIR4435-2HG	√	√			MIR4435-2 host gene	-3.29594	-3.27663	-2.78509	-2.6928	-2.46528	-3.15478
ENSG00000226137.5	BAIAP2-AS1	√	√			BAIAP2 divergent transcript	-2.92294	-2.32801	-3.32477	-2.90389	-2.24176	-1.83805
ENSG00000152133.14	GPATCH11	√	√			G-patch domain containing 11	-2.70657	-2.82438	-2.67464	-2.41858	-2.32156	-2.24641
ENSG00000119669.4	IRF2BPL	√				interferon regulatory factor 2 binding protein like	-2.51049	-2.4954	-4.05948	-2.02758	-1.81078	-2.77138
ENSG00000065361.14	ERBB3	√				erb-b2 receptor tyrosine kinase 3	-3.57693	-2.28366	-2.40185	-2.15641	-1.75774	-2.36436
ENSG00000161791.13	FMNL3	√				formin like 3	-2.18752	-2.09675	-2.16047	-1.90163	-1.80109	-1.96925
ENSG00000157978.11	LDLRAP1	√				low density lipoprotein receptor adaptor protein 1	-2.30565	-1.84423	-1.83459	-1.68776	-1.70668	-2.0603
ENSG00000077238.13	IL4R	√				interleukin 4 receptor	-2.23721	-1.84115	-2.01493	-1.63701	-1.55927	-1.67945
ENSG00000125520.13	SLC2A4RG	√				SLC2A4 regulator	-1.94105	-1.95177	-2.1176	-1.59325	-1.59747	-1.80685
ENSG00000138758.11	SEPT11	√				septin 11	-2.23066	-1.96238	-1.81336	-1.55451	-1.48076	-1.75322
